# Supplementary material for: Identifying Prenatal and Postnatal Determinants of Infant Growth: A Structural Equation Modelling Based Cohort Analysis
Source: Int J Environ Res Public Health. 2021 Sep 29;18(19):10265. doi: 10.3390/ijerph181910265 (PMC8507693; doi:10.3390/ijerph181910265)
Supplement: Supplementary file 1 [file ijerph-18-10265-s001.zip › ijerph-1390561-supplementary.pdf]

# Supplementary Materials

## Statistical Analyses

Based on existing literature, each variable which had a potential effect on infant size was individually tested through linear or logistic regression (results are located in Supplementary table S2). Using confirmatory factor analyses (CFA), the study outcome variable, infant size was modelled as a latent variable with two measured constructs, infant waist circumference and infant weight, both measured at the 12-month follow-up. CFA was also used to identify any clusters amongst significant variables however, no latent variables were apparent. Adopting a stepwise fashion, further regression analyses were carried out to identify any existing relationships between the significant variables and infant size. This process enabled an exploratory SEM model to be created (supplementary figure S1).

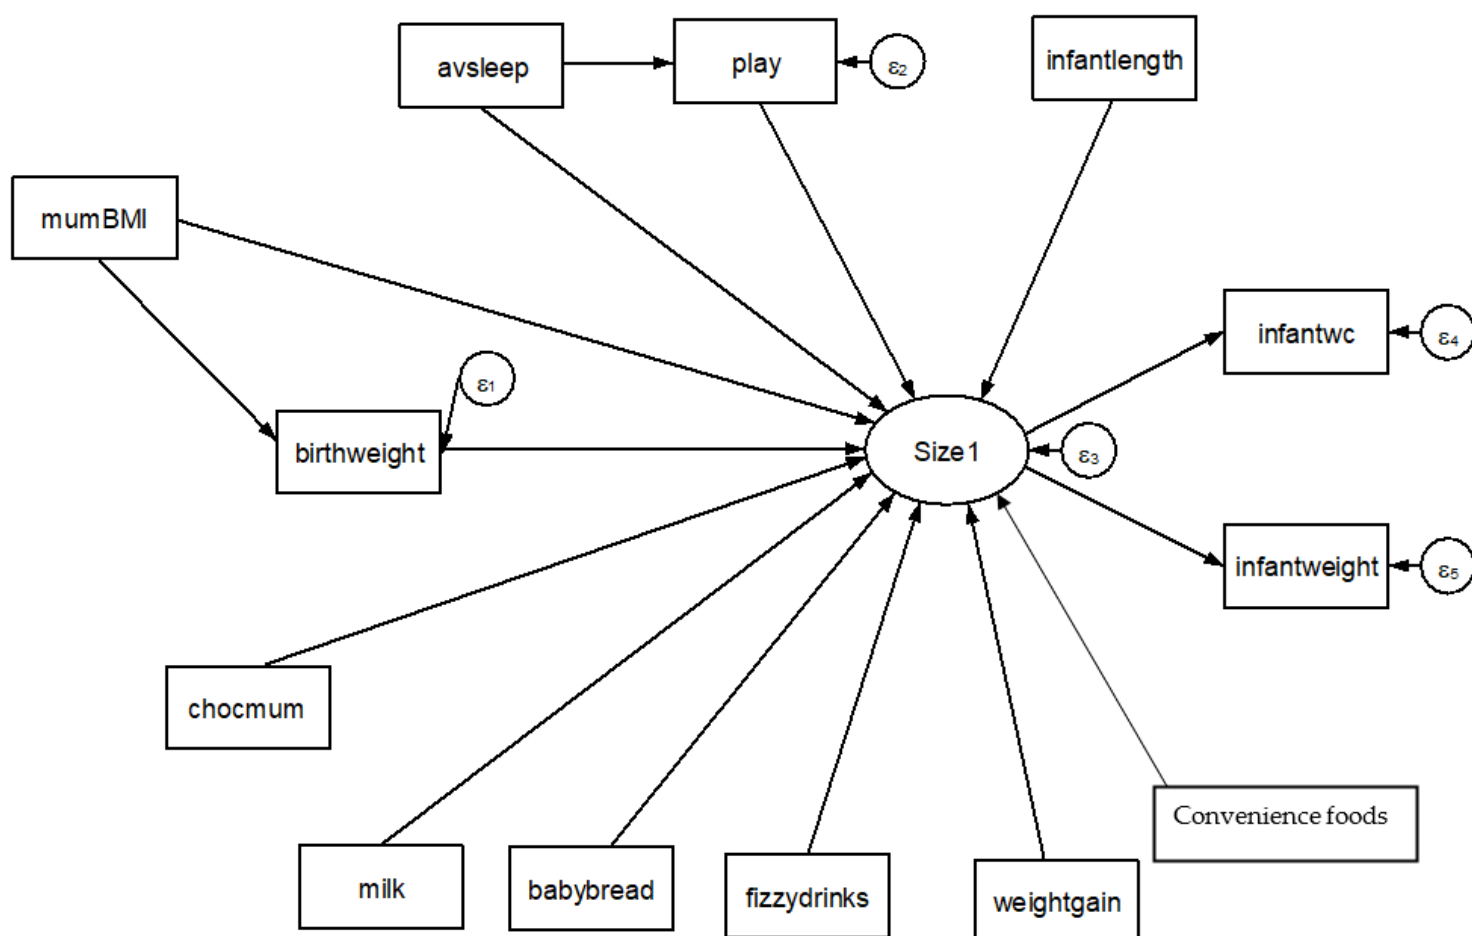

Figure S1. Exploratory structural equation model.

## Method

**Table S1.** Study variables outlining details of assessment and time points of collection.

| Variables                          | Measurement Unit                                                                              | Source           | Time Point                   |
|------------------------------------|-----------------------------------------------------------------------------------------------|------------------|------------------------------|
| <b>Maternal exposures</b>          |                                                                                               |                  |                              |
| Age at delivery                    | Infant date of birth—Mother date of birth                                                     | Questionnaire    | Pregnancy                    |
| Ethnicity                          | White/non-white (0/1)                                                                         | Questionnaire    | Pregnancy                    |
| Pre-pregnancy BMI                  | kg/m <sup>2</sup>                                                                             | Medical records  | Pregnancy                    |
| Skinkfold thickness                | Sum of four skinfolds (mm); biceps, triceps, subscapular and suprailiac                       | Anthropometrist  | Pregnancy and 12 m follow-up |
| Mid-arm circumference              | cm                                                                                            | Anthropometrist  | Pregnancy                    |
| Glucose                            | mmol/l                                                                                        | Anthropometrist  | Pregnancy                    |
| Education level                    | University educated/A-levels /GCSE's /Trade /Other /None                                      | Questionnaire    | Pregnancy                    |
| Employment status                  | Full time/Part time/Seasonal/Homemaker/Student/ Unemployed                                    | Questionnaire    | Pregnancy and 12 m follow-up |
| Household Income                   | £10,000</£10,000–14,999/£15,000–24,999/£25,000–34,999/£35,000–39,999/£40,000–49,999/>£50,000  | Questionnaire    | Pregnancy and 12 m follow-up |
| Household allowance                | £0/£50–149/£150–249/£250–499/£500–999/£1000+                                                  | Questionnaire    | Pregnancy                    |
| Parity                             | 0/1/2+                                                                                        | Medical records  | Pregnancy                    |
| Depression score                   | Kessler 6 score where $\geq 12$ signified                                                     | Questionnaire    | Pregnancy                    |
| Smoking status                     | Yes or no (1/0)                                                                               | Questionnaire    | Pregnancy                    |
| Duration exposed to smoke          | Daily/4–6 times per week/2–3 times a week/once a week/less often/not at all                   | Questionnaire    | Pregnancy                    |
| Alcohol consumption                | Yes or no (1/0)                                                                               | Questionnaire    | Pregnancy                    |
| Physical activity                  | Low activity/High activity (below/above 50th centile)                                         | Accelerometer    | Pregnancy                    |
| Daily consumption of carbohydrates | % of calories                                                                                 | 7-day diet diary | Pregnancy                    |
| Daily consumption of total fat     | % of calories                                                                                 | 7-day diet diary | Pregnancy                    |
| Daily consumption of saturated fat | % of calories                                                                                 | 7-day diet diary | Pregnancy                    |
| Daily consumption of protein       | % of calories                                                                                 | 7-day diet diary | Pregnancy                    |
| Daily consumption of fibre         | Grams per day                                                                                 | 7-day diet diary | Pregnancy                    |
| Alcohol consumption                | Units per week                                                                                | 7-day diet diary | Pregnancy                    |
| Fruit consumption                  | Number per week                                                                               | 7-day diet diary | Pregnancy                    |
| Vegetable consumption              | Number per week                                                                               | 7-day diet diary | Pregnancy                    |
| <b>Postnatal exposures</b>         |                                                                                               |                  |                              |
| Birth weight                       | kg                                                                                            | Medical records  | Birth                        |
| Head circumference                 | cm                                                                                            | Medical records  | Birth                        |
| Apgar score                        | Reading at 1 and 5 minutes (scale 1–10)                                                       | Medical records  | Birth                        |
| Growth rate per week               | (Weight at approximately 6 months—birth weight)/24, above or below 0.16 g gain per week (0/1) | Medical records  | 6 months                     |
| Crawling milestone                 | Age at which first crawled (months)                                                           | Questionnaire    | 12 m follow-up               |
| Walking at age 12 months           | Yes/no (1/0)                                                                                  | Questionnaire    | 12 m follow-up               |
| Breastfed                          | Yes/no (1/0)                                                                                  | Questionnaire    | 12 m follow-up               |

|                                  |                                                                         |                 |                |
|----------------------------------|-------------------------------------------------------------------------|-----------------|----------------|
| Duration of breastfeeding        | Months                                                                  | Questionnaire   | 12 m follow-up |
| Age first fed formula            | Months                                                                  | Questionnaire   | 12 m follow-up |
| Age first given solid foods      | Months                                                                  | Questionnaire   | 12 m follow-up |
| Milk given in past week          | Only breast/only formula/ breast and formula/cow's milk/other           | Questionnaire   | 12 m follow-up |
| Main type of food eaten          | Homemade/readymade/take away (0/1/2)                                    | Questionnaire   | 12 m follow-up |
| <b>Infant food frequency</b>     |                                                                         |                 |                |
| Fruit consumption                | Never/1–2/3–4/5–6/7 days per week                                       | Questionnaire   | 12 m follow-up |
| Vegetable consumption            | Never/1–2/3–4/5–6/7 days per week                                       | Questionnaire   | 12 m follow-up |
| Bread/rice/pasta consumption     | Never/1–2/3–4/5–6/7 days per week                                       | Questionnaire   | 12 m follow-up |
| Fried food consumption           | Never/1–2/3–4/5–6/7 days per week                                       | Questionnaire   | 12 m follow-up |
| Take-away food consumption       | Never/1–2/3–4/5–6/7 days per week                                       | Questionnaire   | 12 m follow-up |
| Crisp consumption                | Never/1–2/3–4/5–6/7 days per week                                       | Questionnaire   | 12 m follow-up |
| Biscuits and cake consumption    | Never/1–2/3–4/5–6/7 days per week                                       | Questionnaire   | 12 m follow-up |
| Chocolate or sweet consumption   | Never/1–2/3–4/5–6/7 days per week                                       | Questionnaire   | 12 m follow-up |
| Carbonated drink consumption     | Never/1–2/3–4/5–6/7 days per week                                       | Questionnaire   | 12 m follow-up |
| <b>Infant sleep</b>              |                                                                         |                 |                |
| Night time sleep                 | Hours and minutes (between 9 pm and 7 am)                               | Questionnaire   | 12 m follow-up |
| Day time sleep                   | Hours and minutes (between 7 am and 7 pm)                               | Questionnaire   | 12 m follow-up |
| Number of awakenings per night   | 0/1/2/3+                                                                | Questionnaire   | 12 m follow-up |
| Time spent in wakefulness        | Hours and minutes                                                       | Questionnaire   | 12 m follow-up |
| Time taken to sleep              | Hours and minutes                                                       | Questionnaire   | 12 m follow-up |
| Time of night sleep occurs       | Hour and minutes                                                        | Questionnaire   | 12 m follow-up |
| Age infant first slept all night | Months                                                                  | Questionnaire   | 12 m follow-up |
| Infant TV viewing duration       | Hours (0/<1/1–2/3–4/5–6/6–7/8–9/10+)                                    | Questionnaire   | 12 m follow-up |
| Maternal TV viewing duration     | Hours (0/<1/1–2/3–4/5–6/6–7/8–9/10+)                                    | Questionnaire   | 12 m follow-up |
| <b>12 m physical activity</b>    |                                                                         |                 |                |
| Duration of readings             | Number of days                                                          | Accelerometer   | 12 m follow-up |
| Time spent sedentary             | Average number of hours                                                 | Accelerometer   | 12 m follow-up |
| Time spent active                | Average number of hours                                                 | Accelerometer   | 12 m follow-up |
| <b>12 m anthropometrics</b>      |                                                                         |                 |                |
| Length                           | cm                                                                      | Anthropometrist | 12 m follow-up |
| Weight                           | Kg                                                                      | Anthropometrist | 12 m follow-up |
| Mid-arm circumference            | cm                                                                      | Anthropometrist | 12 m follow-up |
| Waist circumference              | cm                                                                      | Anthropometrist | 12 m follow-up |
| Skinfold thicknesses             | Sum of four skinfolds (mm); biceps, triceps, subscapular and suprailiac | Anthropometrist | 12 m follow-up |

## Statistical Analysis

**Table S2.** Model Specification: Direct effect estimates for all variables with latent outcome—infant size.

| Explanatory Variable                          | Number (%) | Mean (SD)    | Slope (95% CI)       | Mean Difference (95% CI) |
|-----------------------------------------------|------------|--------------|----------------------|--------------------------|
| <b>Demographics during pregnancy</b>          |            |              |                      |                          |
| Maternal age at delivery (years) (n = 218)    |            |              |                      |                          |
| 18–25                                         | 39 (17.8)  | -0.03 (0.8)  | -                    |                          |
| 26–30                                         | 64 (29.4)  | -0.03 (0.8)  | -0.06 (-0.3 to 0.2)  |                          |
| 31–35                                         | 63 (28.9)  | -0.07 (0.8)  | -0.17 (-0.5 to 0.1)  |                          |
| ≥36                                           | 52 (23.9)  | -0.02 (0.8)  | -0.01 (-0.3 to 0.3)  |                          |
| Maternal age (continuous)                     | 218        |              |                      | 0.00 (-0.01 to 0.02)     |
| Ethnicity (n = 225)                           |            |              |                      |                          |
| White                                         | 186 (82.7) | 0.02 (0.7)   |                      | -                        |
| Non-white                                     | 39 (17.3)  | -0.10 (0.8)  |                      | 0.11 (-0.2 to 0.4)       |
| Mother education (n = 162)                    |            |              |                      |                          |
| None                                          | 14 (8.6)   | -0.44 (0.5)  | -                    |                          |
| Trade or other                                | 16 (9.9)   | -0.12 (0.7)  | 0.15 (-0.6 to 0.9)   |                          |
| School attainment                             | 30 (18.5)  | -0.10 (0.9)  | 0.38 (-0.2 to 1.0)   |                          |
| University attainment                         | 102 (63)   | 0.04 (0.7)   | 0.44 (-0.9 to 1.0)   |                          |
| Father education (n = 141)                    |            |              |                      |                          |
| None                                          | 8 (5.7)    | -0.18 (0.7)  | -                    |                          |
| Trade or other                                | 37 (26.3)  | 0.21 (0.7)   | 0.56 (-0.2 to 1.3)   |                          |
| School attainment                             | 16 (11.3)  | 0.25 (0.9)   | 0.64 (-0.2 to 1.5)   |                          |
| University attainment                         | 80 (56.7)  | -0.10 (0.7)  | -0.23 (-0.5 to 0.9)  |                          |
| Mother employment (n = 218)                   |            |              |                      |                          |
| Unemployed/Homemaker                          | 54 (24.8)  | -0.18 (0.8)  |                      | -                        |
| Employed                                      | 164 (75.2) | 0.03 (0.7)   |                      | -0.21 (-0.4 to 0.01)     |
| Father employment (n = 200)                   |            |              |                      |                          |
| Unemployed                                    | 18 (9)     | 0.06 (0.6)   |                      |                          |
| Employed                                      | 182 (91)   | 0.00 (0.7)   |                      | 0.1 (-0.3 to 0.4)        |
| Household allowance (£) (n = 225)             |            |              |                      |                          |
| £0                                            | 74 (32.9)  | -0.02 (0.7)  | -                    |                          |
| £50–250                                       | 61 (27.1)  | 0.19 (0.7)   | 0.21 (-0.03 to 0.5)  |                          |
| £251–1000                                     | 90 (40.0)  | -0.12 (0.8)  | -0.10 (-0.43 to 0.1) |                          |
| <b>Maternal lifestyle during pregnancy</b>    |            |              |                      |                          |
| Passive smoking (n = 225)                     |            |              |                      |                          |
| No                                            | 146 (64.9) | 0.07 (0.7)   |                      | -                        |
| Yes                                           | 79 (35.1)  | -0.13 (0.8)  |                      | 0.20 (-0.00 to 0.4)      |
| Smoking in pregnancy                          |            |              |                      |                          |
| No                                            | 176 (84.2) | -0.003 (0.7) |                      | -                        |
| Yes                                           | 35 (15.8)  | 0.002 (0.8)  |                      | 0.01 (-0.3 to 0.3)       |
| Parity (n = 225)                              |            |              |                      |                          |
| ≤1                                            | 187 (83.1) | 0.03 (0.7)   |                      |                          |
| >1                                            | 38 (16.9)  | -0.15 (0.8)  |                      | 0.18 (-0.1 to 0.4)       |
| <b>Maternal activity</b>                      |            |              |                      |                          |
| Maternal exercise (bouts per week) (n = 151)  |            |              |                      |                          |
| 0                                             | 57 (37.7)  | -0.04 (0.7)  | -                    |                          |
| 1                                             | 36 (23.8)  | 0.16 (0.7)   | 0.20 (-0.1 to 0.5)   |                          |
| 2 to 3                                        | 41 (27.2)  | 0.01 (0.8)   | 0.05 (-0.2 to 0.3)   |                          |
| >3                                            | 17 (11.3)  | 0.3 (0.6)    | 0.31 (-0.1 to 0.7)   |                          |
| <b>Maternal dietary consumption (n = 158)</b> |            |              |                      |                          |
| Recommended fat (%)                           |            |              |                      |                          |
| Yes                                           | 94 (59.5)  | 0.03 (0.7)   |                      | -                        |
| No                                            | 64 (40.5)  | 0.06 (0.8)   |                      | -0.03 (-0.3 to 0.2)      |
| Recommended saturated fat (%)                 |            |              |                      |                          |
| Yes                                           | 37 (23.4)  | -0.03 (0.6)  |                      | -                        |
| No                                            | 121 (76.6) | 0.06 (0.8)   |                      | -0.09 (-0.4 to 0.2)      |

|                                         |            |             |                      |                       |
|-----------------------------------------|------------|-------------|----------------------|-----------------------|
|                                         |            |             |                      |                       |
| Recommended carbohydrate (%)            |            |             |                      |                       |
| Yes                                     | 127 (80.4) | 0.04 (0.7)  |                      | -                     |
| No                                      | 31 (19.6)  | 0.03 (0.8)  |                      | 0.02 (-0.3 to 0.3)    |
| Maternal fruit (portions)               |            |             |                      |                       |
| 0                                       | 21 (13.3)  | 0.02 (0.9)  | -                    |                       |
| 1–10                                    | 78 (49.4)  | 0.11 (0.7)  | 0.09 (-0.2 to 0.4)   |                       |
| 11–20                                   | 47 (29.7)  | -0.13 (0.7) | -0.15 (-0.5 to 0.2)  |                       |
| 20+                                     | 12 (7.6)   | 0.26 (0.6)  | 0.24 (-0.3 to 0.8)   |                       |
| Maternal vegetable (portions)           |            |             |                      |                       |
| 0–10                                    | 95 (60.1)  |             | -                    |                       |
| 11–20                                   | 51 (32.3)  |             | -0.06 (-0.3 to 0.2)  |                       |
| 20+                                     | 12 (7.6)   |             | -0.03 (-0.5 to 0.4)  |                       |
| <b>Perinatal outcomes</b>               |            |             |                      |                       |
| Gender (n = 125)                        |            |             |                      |                       |
| Female                                  | 103 (47.4) | -0.19 (0.7) |                      |                       |
| Male                                    | 122 (52.6) | 0.16 (0.7)  |                      | 0.35 (0.2 to 0.5)     |
| Gestation (weeks) (n = 225)             |            |             |                      |                       |
| <37                                     | 8 (3.6)    | -0.24 (0.8) |                      | -                     |
| ≥37                                     | 217 (96.4) | 0.01 (0.7)  |                      | -0.25 (-0.8 to 0.3)   |
| Gestation (Continuous)                  |            |             | 0.01 (-0.1 to 0.1)   |                       |
| Apgar 1 minutes (n = 225)               |            |             |                      |                       |
| <7                                      | 8 (3.6)    | -0.12 (0.7) |                      | -                     |
| ≥7                                      | 217 (96.4) | 0.00 (0.7)  |                      | -0.12 (-0.6 to 0.4)   |
| Induction (n = 91)                      |            |             |                      |                       |
| Yes                                     | 21 (23.1)  | 0.24 (0.7)  |                      | -                     |
| No                                      | 70 (76.9)  | -0.00 (0.7) |                      | -0.24 (-0.6 to 0.1)   |
| Smoking at birth (n = 84)               |            |             |                      |                       |
| Yes                                     | 9 (10.7)   | -0.23 (0.6) |                      | -                     |
| No                                      | 75 (89.3)  | 0.08 (0.7)  |                      | 0.31 (-0.2 to 0.8)    |
| Siblings born macrosomic (n = 100)      |            |             |                      |                       |
| No                                      | 85 (85)    | -0.07 (0.7) |                      |                       |
| Yes                                     | 15 (15)    | 0.37 (0.8)  |                      | -0.44 (-0.9 to -0.03) |
| <b>Demographics at 12 months</b>        |            |             |                      |                       |
| Mother employment (n = 223)             |            |             |                      |                       |
| Unemployed                              | 51 (22.9)  | -0.08 (0.8) |                      | -                     |
| Employed                                | 172 (77.1) | -0.02 (0.7) |                      | -0.06 (-0.3 to 0.2)   |
| Father employment (n = 187)             |            |             |                      |                       |
| Unemployed                              | 5 (3.2)    | 0.22 (0.4)  |                      | -                     |
| Employed                                | 182 (96.8) | -0.04 (0.7) |                      | 0.26 (-0.4 to 0.9)    |
| Household income (n = 175)              |            |             |                      |                       |
| £0–15,000                               | 38 (21.7)  | -0.10 (0.7) |                      | -                     |
| £15,000+                                | 137 (78.3) | 0.06 (0.7)  |                      | -0.16 (-0.4 to 0.1)   |
| Reported financial state (n = 193)      |            |             |                      |                       |
| Comfortable                             | 37 (19.1)  | -0.01 (0.6) | -                    |                       |
| Doing OK                                | 81 (42)    | -0.02 (0.8) | 0.07 (-0.2 to 0.4)   |                       |
| Just getting by                         | 54 (28)    | 0.09 (0.7)  | 0.17 (-0.1 to 0.5)   |                       |
| Quite difficult                         | 17 (8.8)   | -0.31 (0.9) | -0.22 (-0.6 to 0.2)  |                       |
| Very difficult                          | 4 (2.1)    | 0.19 (0.7)  | 0.27 (-0.5 to 1.1)   |                       |
| <b>Maternal anthropometrics at 12 m</b> |            |             |                      |                       |
| Total skinfold thickness (n = 225)      |            |             |                      |                       |
| Low tertile (<60.6 mm)                  | 78 (34.6)  | -0.11 (0.7) | -                    |                       |
| Middle tertile (60.6–104 mm)            | 68 (30.3)  | -0.04 (0.9) | 0.08 (-0.2 to 0.3)   |                       |
| High tertile (>104 mm)                  | 79 (35.1)  | 0.14 (0.7)  | 0.26 (0.02 to 0.5)   |                       |
| Total skinfold thickness (Continuous)   |            |             | 0.002 (-.00 to 0.01) |                       |
| <b>Maternal lifestyle at 12 m</b>       |            |             |                      |                       |
| TV viewing per day (n = 193)            |            |             |                      |                       |
| 0–1 hour                                | 28 (14.5)  | 0.12 (0.7)  | -                    |                       |

|                                                      |            |             |                       |                     |
|------------------------------------------------------|------------|-------------|-----------------------|---------------------|
|                                                      |            |             |                       |                     |
| 1–2 hours                                            | 81 (42)    | -0.04 (0.7) | -0.17 (-0.5 to 0.1)   |                     |
| 3–4 hours                                            | 58 (30.1)  | -0.03 (0.7) | -0.16 (-0.5 to 0.2)   |                     |
| 5+ hours                                             | 26 (13.4)  | 0.10 (0.8)  | -0.22 (-0.6 to 0.2)   |                     |
| Depression score (n = 194)                           |            |             |                       |                     |
| <12                                                  | 188 (95.9) | -0.02 (0.7) |                       | -                   |
| ≥12                                                  | 6 (4.1)    | -0.11 (0.9) |                       | 0.09 (-0.5 to 0.7)  |
| Maternal exercise (bouts per week) (n = 105)         |            |             |                       |                     |
| 0                                                    | 36 (34.3)  | -0.09 (0.8) | -                     |                     |
| 1                                                    | 21 (20)    | -0.09 (0.7) | -0.08 (-0.4 to 0.5)   |                     |
| 2 to 3                                               | 28 (26.7)  | 0.20 (0.8)  | 0.30 (-0.1 to 0.7)    |                     |
| >3                                                   | 20 (19.0)  | 0.06 (0.7)  | 0.15 (-0.3 to 0.6)    |                     |
| <b>Maternal food frequency (days of consumption)</b> |            |             |                       |                     |
| <b>(n = 190)</b>                                     |            |             |                       |                     |
| Fruit                                                |            |             |                       |                     |
| 7                                                    | 83 (43.7)  | 0.08 (0.7)  | -                     |                     |
| 5–6                                                  | 33 (17.4)  | 0.04 (0.7)  | -0.04 (-0.3 to 0.3)   |                     |
| 3–4                                                  | 38 (20)    | -0.10 (0.7) | -0.18 (-0.5 to 0.1)   |                     |
| 2 or less                                            | 36 (18.9)  | -0.18 (0.8) | -0.26 (-0.5 to 0.03)  |                     |
| Vegetables                                           |            |             |                       |                     |
| 7                                                    | 108 (56.8) | 0.06 (0.7)  | -                     |                     |
| 5–6                                                  | 36 (18.9)  | -0.07 (0.7) | -0.13 (-0.4 to 0.1)   |                     |
| 4 or less                                            | 46 (24.2)  | -0.13 (0.7) | -0.18 (-0.5 to 0.1)   |                     |
| Bread, rice, pasta or potatoes                       |            |             |                       |                     |
| 7                                                    | 131 (68.9) | 0.02 (0.7)  | -                     |                     |
| 5–6                                                  | 30 (15.8)  | -0.06 (0.7) | -0.09 (-0.4 to 0.2)   |                     |
| 4 or less                                            | 29 (15.3)  | -0.15 (0.7) | -0.17 (-0.5 to 0.1)   |                     |
| Fried foods (n = 222)                                |            |             |                       |                     |
| 4 or more                                            | 30 (16)    | -0.01 (0.8) | -                     |                     |
| 1–2                                                  | 100 (53.5) | 0.02 (0.7)  | 0.03 (-0.3 to 0.3)    |                     |
| Never                                                | 57 (30.5)  | -0.08 (0.7) | -0.06 (-0.4 to 0.3)   |                     |
| Take-away foods (n = 220)                            |            |             |                       |                     |
| 1 or more                                            | 132 (70.6) | -0.02 (0.7) |                       |                     |
| Never                                                | 55 (29.4)  | 0.01 (0.8)  |                       | -0.13 (-0.4 to 0.2) |
| Convenience foods (n = 184)                          |            |             |                       |                     |
| 1 or more                                            | 78 (42.4)  | -0.06 (0.7) |                       |                     |
| Never                                                | 106 (57.6) | 0.02 (0.7)  |                       | -0.08 (-0.3 to 0.1) |
| Crisps (n = 223)                                     |            |             |                       |                     |
| 3–4                                                  | 51 (27.1)  | -0.14 (0.7) | -                     |                     |
| 1–2                                                  | 75 (39.9)  | 0.09 (0.7)  | 0.23 (-0.03 to 0.4)   |                     |
| Never                                                | 62 (33)    | -0.04 (0.8) | 0.10 (-0.2 to 0.4)    |                     |
| Biscuits (n = 189)                                   |            |             |                       |                     |
| 1–7                                                  | 161 (85.2) | 0.01 (0.1)  |                       | -                   |
| Never                                                | 28 (14.8)  | -0.14 (0.1) |                       | -0.15 (-0.5 to 0.1) |
| Chocolate (n = 187)                                  |            |             |                       |                     |
| 1 or more                                            | 150 (80.2) | 0.05        |                       | -                   |
| Never                                                | 37 (19.8)  | -0.27 (0.7) |                       | 0.32 (0.07 to 0.6)  |
| Carbonated drinks                                    |            |             |                       |                     |
| 3–4                                                  | 60 (31.9)  | -0.07 (0.8) |                       |                     |
| 1–2                                                  | 57 (30.3)  | 0.05 (0.7)  | 0.12 (-0.2 to 0.4)    |                     |
| Never                                                | 71 (37.8)  | -0.01 (0.7) | 0.06 (-0.2 to 0.3)    |                     |
| <b>Infant lifestyle</b>                              |            |             |                       |                     |
| Weight gain per week (birth to 6 months) (n = 225)   |            |             |                       |                     |
| low tertile (≤0.16 g)                                | 115 (51.1) | -0.11 (0.7) | -                     |                     |
| high tertile (>0.16 g)                               | 110 (48.9) | 0.11 (0.8)  | -0.22 (-0.4 to -0.03) |                     |
| Weight gain per week (Continuous)                    |            |             |                       | 4.0 (1.4 to 6.5)    |
| <b>Sleep</b>                                         |            |             |                       |                     |
| Wakings per night (n = 225)                          |            |             |                       |                     |

|                                                     |            |             |                         |                      |
|-----------------------------------------------------|------------|-------------|-------------------------|----------------------|
| <2                                                  | 129 (57.3) | 0.01 (0.7)  | -0.14 (-0.5 to 0.2)     |                      |
| ≥2                                                  | 96 (42.7)  | -0.01 (0.8) | -0.07 (-0.4 to 0.2)     |                      |
| Wakings per night (Continuous)                      |            |             | -0.07 (-0.1 to 0.0)     |                      |
| Mean daily sleep duration (hours per day) (n = 216) |            |             |                         |                      |
| <10                                                 | 15 (6.9)   | -0.44 (0.6) | -                       |                      |
| 10–12                                               | 68 (31.5)  | 0.07 (0.7)  | 0.51 (0.1 to 0.9)       |                      |
| 12.5–14                                             | 81 (37.5)  | -0.01 (0.7) | 0.43 (0.3 to 0.8)       |                      |
| 15–17                                               | 52 (24.1)  | 0.10 (0.7)  | 0.54 (0.1 to 0.9)       |                      |
| Mean daily sleep duration (Continuous)              |            |             | 0.11 (0.04 to 0.2)      |                      |
| Age first slept through (n = 219)                   |            |             |                         |                      |
| 0–3 months                                          | 112 (51.4) | -0.06 (0.7) | -                       |                      |
| >3–6 months                                         | 56 (25.6)  | 0.05 (0.7)  | 0.12 (-0.1 to 0.4)      |                      |
| >6–12 months                                        | 45 (20.6)  | 0.13 (0.7)  | 0.20 (-0.1 to 0.5)      |                      |
| Never                                               | 6 (2.7)    | -0.82 (0.6) | -0.75 (-1.4 to -0.1)    |                      |
| Age first slept through (Continuous)                |            |             | -0.01 (-0.01 to -0.001) |                      |
| Sleep considered a problem (n = 192)                |            |             |                         |                      |
| No                                                  | 48 (25)    | -0.02 (0.7) |                         | -                    |
| Yes                                                 | 144 (75)   | -0.01 (0.7) |                         | -0.004 (-0.2 to 0.2) |
| <b>Infant development</b>                           |            |             |                         |                      |
| Walking at age 12 months (n = 194)                  |            |             |                         |                      |
| Yes                                                 | 103 (53.1) | -0.04 (0.7) |                         | -                    |
| No                                                  | 91 (46.9)  | 0.00 (0.8)  |                         | -0.04 (-0.2 to 1.2)  |
| Age first crawled (n = 187)                         |            |             |                         |                      |
| ≤6 months                                           | 42 (22.5)  | -0.09 (0.6) | -                       |                      |
| >6–9 months                                         | 95 (50.8)  | -0.02 (0.7) | 0.07 (-0.2 to 0.6)      |                      |
| 9–12 months                                         | 41 (21.9)  | 0.04 (0.8)  | 0.12 (-0.2 to 0.7)      |                      |
| Never                                               | 9 (4.8)    | 0.07 (0.8)  | 0.16 (-0.4 to 0.9)      |                      |
| <b>Infant activity</b>                              |            |             |                         |                      |
| Play with infant (n = 194)                          |            |             |                         |                      |
| More than once a day                                | 190 (97.9) | -0.01 (0.7) |                         | -                    |
| Less often                                          | 4 (2.1)    | -0.69 (0.6) |                         | 0.68 (-0.04 to 1.4)  |
| Play physically active games (n = 190)              |            |             |                         |                      |
| Every day                                           | 156 (82.1) | 0.06 (0.7)  |                         | -                    |
| Less often                                          | 34 (17.9)  | -0.32 (0.7) |                         | -0.36 (-0.7 to 0.0)  |
| Frequency going to park (n = 194)                   |            |             |                         |                      |
| Every day                                           | 12 (6.2)   | -0.21 (0.6) | -                       |                      |
| Several times a week                                | 136 (70.1) | 0.00 (0.8)  | 0.22 (-0.2 to 0.7)      |                      |
| Monthly/Never                                       | 46 (23.7)  | -0.04 (0.7) | 0.17 (-0.3 to 0.6)      |                      |
| TV viewing per day (n = 193)                        |            |             |                         |                      |
| None                                                | 38 (19.7)  | -0.09 (0.7) | -                       |                      |
| less than 1 hour                                    | 68 (35.2)  | 0.06 (0.7)  | 0.15 (-0.1 to 0.4)      |                      |
| 1–2 hours                                           | 52 (26.9)  | -0.10 (0.8) | -0.02 (-0.3 to 0.3)     |                      |
| 3+ hours                                            | 35 (18.1)  | 0.01 (0.7)  | 0.09 (-0.2 to 0.4)      |                      |
| Time spent sedentary (hours) (n = 44)               |            |             |                         |                      |
| <5                                                  | 12         | 0.42 (0.1)  |                         | -                    |
| 5+                                                  | 32         | -0.11 (0.1) |                         | 0.53 (0.07 to 0.98)  |
| Time spent sedentary (Continuous)                   |            |             | -0.03 (-0.1 to 0.0)     |                      |
| Intensity of time spent active (SVM)                |            |             |                         |                      |
| Low tertile (<175832.1)                             | 19         | -0.02 (0.7) | -                       |                      |
| Middle tertile (175832.1)                           | 18         | 0.17 (0.6)  | 0.18 (-0.2 to 0.6)      |                      |
| high tertile (302475.5)                             | 16         | -0.16 (0.5) | -0.14 (-0.6 to 0.3)     |                      |
| <b>Infant feeding</b>                               |            |             |                         |                      |
| Initial mode of feeding (n = 194)                   |            |             |                         |                      |
| Breastfed                                           | 165 (85.1) | -0.02 (0.7) |                         | -                    |
| Formula                                             | 29 (14.9)  | -0.02 (0.8) |                         | -0.00 (-0.3 to 0.3)  |
| Mode of feeding at 12 months (n = 193)              |            |             |                         |                      |

|                                                    |            |                      |                      |
|----------------------------------------------------|------------|----------------------|----------------------|
| Breast                                             | 25 (13)    | -0.31 (0.6)          | -                    |
| Other milk                                         | 168 (87)   | 0.03 (0.7)           | -0.35 (-0.7 to -0.1) |
| Duration of breastfeeding (n = 225)                |            |                      |                      |
| <6 months                                          | 94 (41.8)  | -0.09 (0.8)          | -                    |
| 6+ months                                          | 131 (58.2) | 0.06 (0.7)           | -0.15 (-0.3 to 0.04) |
| Introduction of solids (months) (n = 189)          |            |                      |                      |
| <4                                                 | 56 (29.6)  | 0.06 (0.8)           | -                    |
| 4+                                                 | 133 (70.4) | -0.06 (0.7)          | 0.12 (-0.1 to 0.4)   |
| Age of introduction (Continuous)                   |            | -0.03 (-0.1 to 0.04) |                      |
| <b>Infant food frequency (days of consumption)</b> |            |                      |                      |
| Vegetables (n = 193)                               |            |                      |                      |
| 7                                                  | 144 (74.6) | -0.01 (0.8)          | -                    |
| 5-6                                                | 20 (10.4)  | -0.04 (0.6)          | -0.04 (-0.4 to 0.4)  |
| 0-4                                                | 29 (15)    | -0.09 (0.7)          | -0.19 (-0.4 to 0.2)  |
| Bread, rice, pasta or potatoes (n = 191)           |            |                      |                      |
| 7                                                  | 138 (70.1) | 0.07 (0.1)           | -                    |
| Less than 7                                        | 53 (11.7)  | -0.21 (0.1)          | -0.28 (-0.5 to -0.1) |
| Fried foods (n = 188)                              |            |                      |                      |
| 3-7                                                | 12 (6.4)   | -0.09 (0.8)          | -                    |
| 1-2                                                | 45 (23.9)  | -0.04 (0.8)          | 0.05 (-0.4 to 0.5)   |
| Never                                              | 131 (69.7) | 0.02 (0.7)           | 0.11 (-0.3 to 0.5)   |
| Take-away foods (n = 186)                          |            |                      |                      |
| 1-7                                                | 22 (10.5)  | 0.11 (0.8)           | -                    |
| Never                                              | 164 (89.5) | -0.01 (0.7)          | -0.12 (-0.4 to 0.2)  |
| Convenience foods (n = 188)                        |            |                      |                      |
| 3-7                                                | 48 (25.5)  | -0.18 (0.1)          | -                    |
| 0-2                                                | 140 (74.5) | 0.06 (0.1)           | 0.24 (0.01 to 0.5)   |
| Crisps (n = 190)                                   |            |                      |                      |
| 5-7                                                | 14 (7.4)   | -0.26 (0.8)          | -                    |
| 3-4                                                | 22 (11.6)  | 0.05 (0.8)           | 0.31 (-0.2 to 0.8)   |
| 1-2                                                | 58 (30.5)  | 0.06 (0.8)           | 0.33 (-0.1 to 0.7)   |
| Never                                              | 96 (50.5)  | -0.02 (0.7)          | 0.24 (-0.2 to 0.6)   |
| Biscuits or cakes (n = 190)                        |            |                      |                      |
| 5-7                                                | 22 (11.6)  | -0.18 (0.8)          | -                    |
| 3-4                                                | 37 (19.5)  | 0.09 (0.8)           | 0.28 (-0.1 to 0.7)   |
| 1-2                                                | 85 (44.7)  | 0.04 (0.7)           | 0.22 (-0.1 to 0.5)   |
| Never                                              | 46 (24.2)  | -0.08 (0.6)          | 0.10 (-0.3 to 0.5)   |
| Chocolate or sweets (n = 192)                      |            |                      |                      |
| 3-7                                                | 18 (9.4)   | -0.13 (0.7)          | -                    |
| 1-2                                                | 61 (31.8)  | -0.10 (0.9)          | 0.03 (-0.4 to 0.4)   |
| Never                                              | 113 (58.8) | 0.06 (0.6)           | 0.19 (-0.2 to 0.6)   |
| Carbonated drinks (n = 191)                        |            |                      |                      |
| 1-7                                                | 11 (5.8)   | -0.52 (0.8)          | -                    |
| Never                                              | 180 (94.2) | 0.03 (0.7)           | 0.55 (0.1 to 0.9)    |

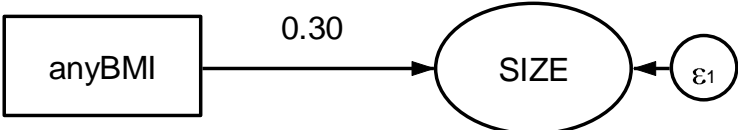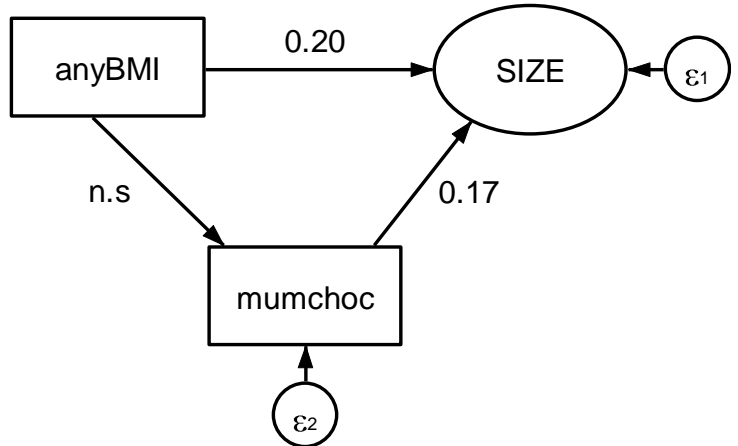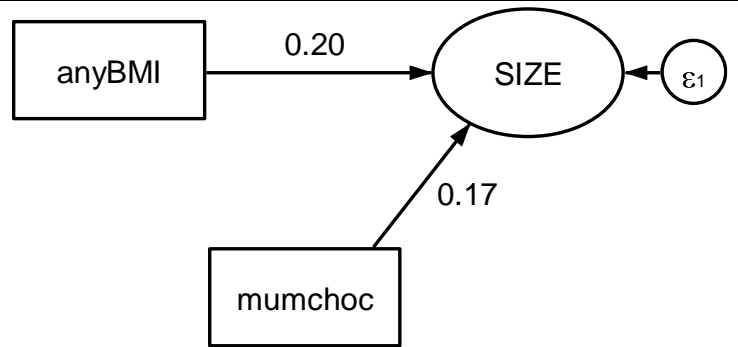

(a)

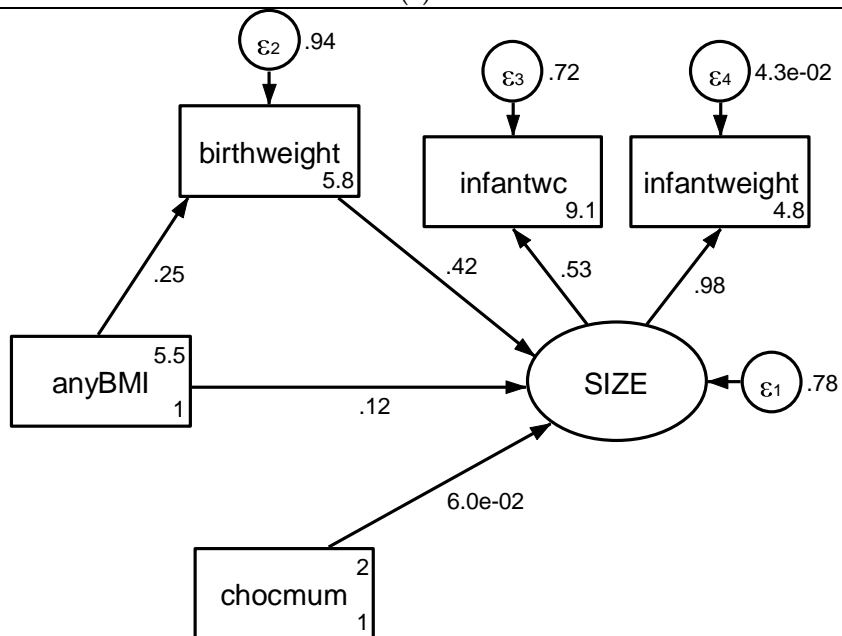

(b)

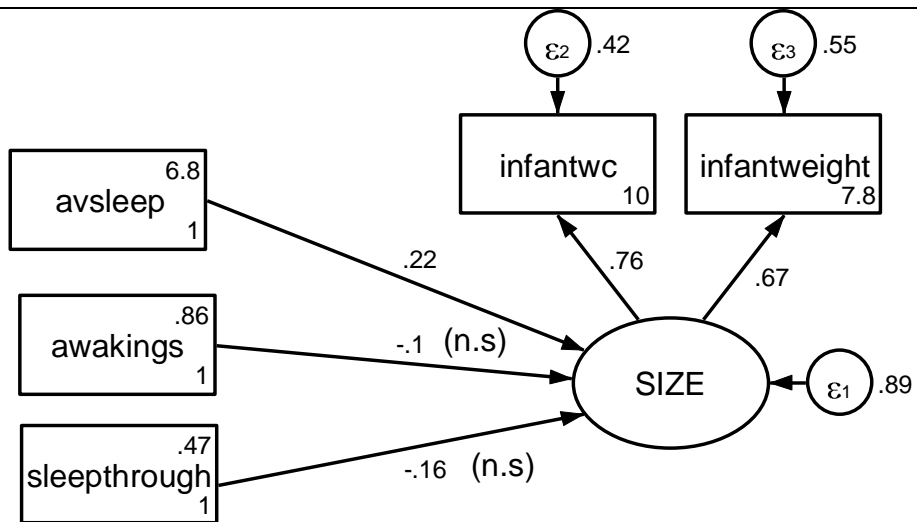

(c)

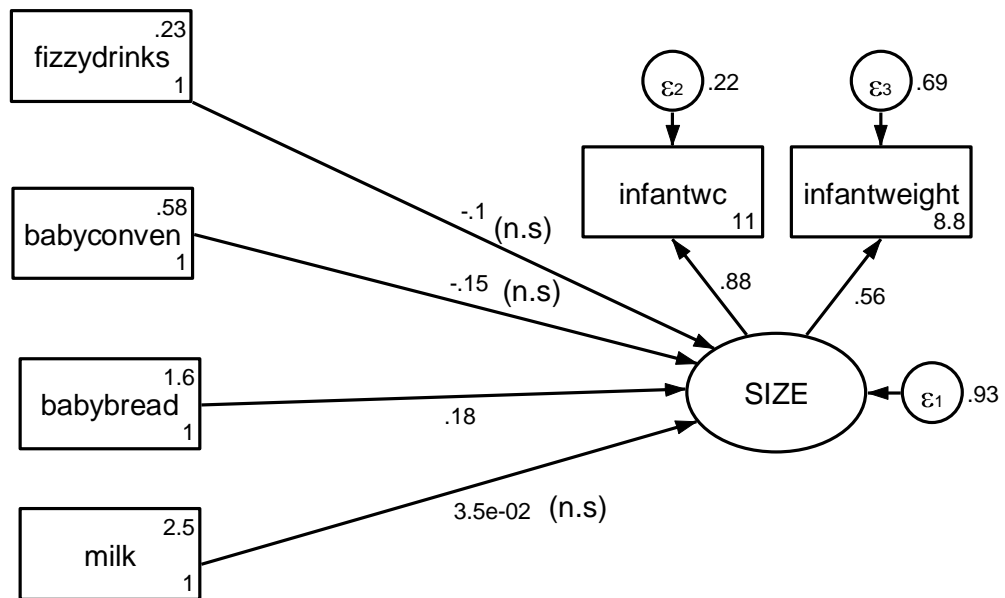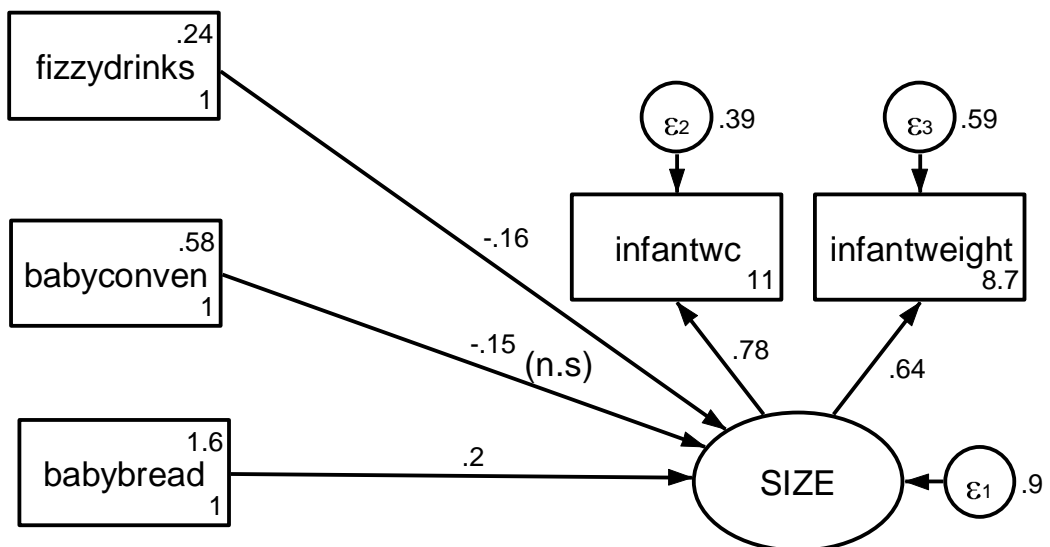

(d)

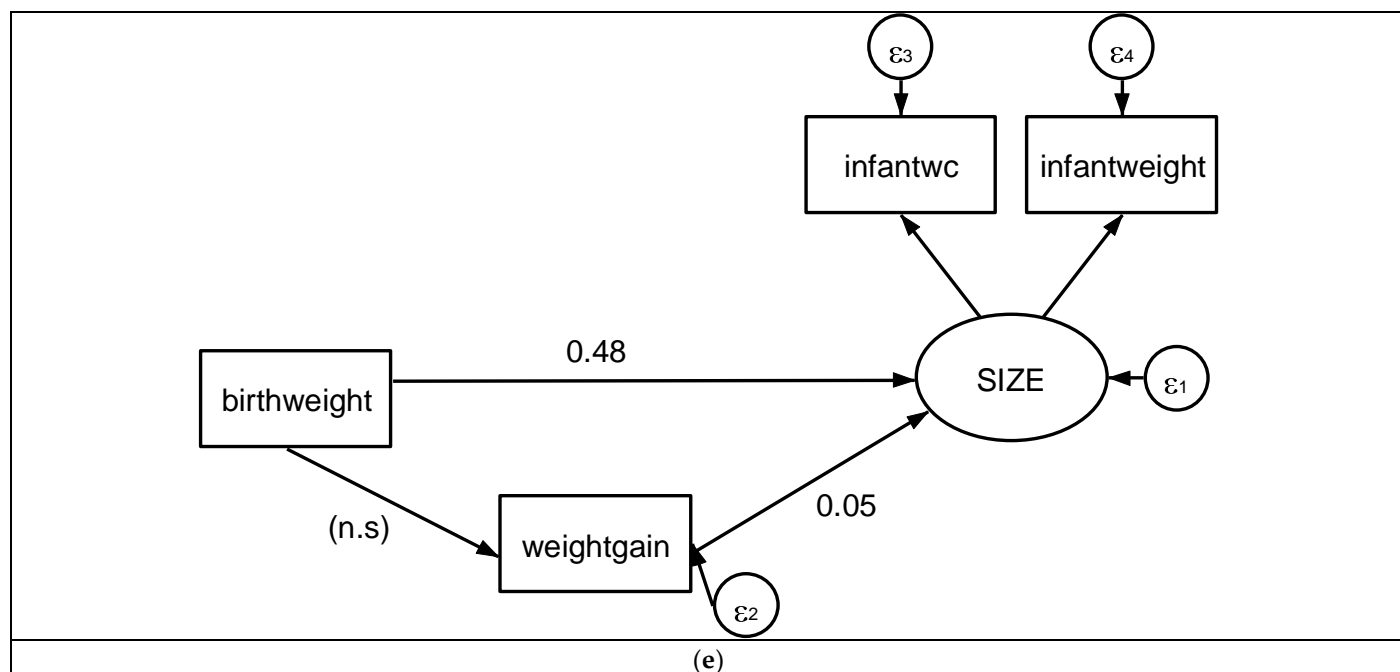

**Figure S2.** Identifying pathways within the exploratory SEM. Note: All findings are reported as standardised coefficients. (a) Step 1: Testing the relation between maternal factors. (b) Step 2: Consideration of infant birth weight. (c) Step 3: Inclusion of infant sleep factors. (d) Step 4: Inclusion of infant feeding factors. Infant milk was removed from the model as it revealed the lowest significant association ( $p > 0.1$ ), thereafter infant consumption of convenience foods was removed ( $p > 0.1$ ). (e) Step 5: Infant birth weight and weight gain relations

### Key to figures

| Symbol/Label | Meaning                                                       |
|--------------|---------------------------------------------------------------|
|              | Observed Variable                                             |
|              | Latent variable                                               |
|              | Residual error                                                |
|              | Predictive relationship/hypothesised pathway                  |
|              | Correlation                                                   |
| (n.s)        | Non-significant association                                   |
|              | Error terms i.e., residual variances                          |
| anyBMI       | Pre-pregnancy BMI                                             |
| Mumchoc      | Maternal chocolate consumption at 12 months                   |
| Infantwc     | Infant waist circumference                                    |
| Babybread    | Infant carbohydrate consumption                               |
| Babyconven   | Infant consumption of convenience foods                       |
| Fizzydrinks  | Infant consumption of carbonated drinks                       |
| Milk         | Consumption of milk (other than breast milk) at age 12 months |
| Avsleep      | Average length of infant sleep                                |
| Awakings     | Number of times infant awakes per night                       |

|              |                                                              |
|--------------|--------------------------------------------------------------|
| Sleepthrough | Age infant first slept all night                             |
| Weightgain   | Average infant weight gain per week (from 0–6 months of age) |

**Table S3.** Descriptive statistics for all variables included within the modified model.

| Construct and Related Variables                               | Values                     |
|---------------------------------------------------------------|----------------------------|
| Pre-pregnancy BMI                                             |                            |
| Body mass index at 12 weeks gestation (in kg/m <sup>2</sup> ) | 24.7 ± 4.7<br>(16.7–54)    |
| Birth weight                                                  |                            |
| Kilograms (kg)                                                | 3.44 ± 0.49<br>(1.75–4.54) |
| Infant play                                                   |                            |
| Questionnaire                                                 | 0.18 ± 0.4                 |
| Infant carbohydrate consumption                               |                            |
| Food frequency questionnaire                                  | 0.72 ± 0.5                 |
| Infant fizzy drink consumption                                |                            |
| Food frequency questionnaire                                  | 0.06 ± 0.23                |
| Infant weight gain                                            |                            |
| Average weekly weight gain from birth to 6 months (g)         | 0.14 ± 0.04<br>(0.02–0.26) |
| Infant length                                                 |                            |
| Measured at age 12 months (cm)                                | 76.85 ± 5.1<br>(46.7–98)   |
| Infant size                                                   |                            |
| Infant waist circumference at age 12 months (cm)              | 46.71 ± 4.1<br>(32.2–56.1) |
| Infant weight at age 12 months (kg)                           | 9.80 ± 1.2<br>(6.7–13.3)   |

Mean ± SD with range in parentheses.

## Discussion

Data availability affected our capacity to include potentially important variables within our model. Recognising the importance of body composition when evaluating infant size, the present study gathered skinfold thickness measures at age 1 year. As a child's BMI does not remain relatively constant with a dramatic rise in fat mass throughout the first year of life, it is desirable to distinguish between fat mass and fat-free mass. Unfortunately, due to insufficient data, inclusion of this variable within our SEM analyses was not possible. Reasons for the unavailability of data include; difficulty in obtaining measures in individuals at a young age, consent not given to gather the measures and no follow-up visit data. Once the cohort has achieved a higher number of participants, future work shall look to evaluate determinants of infant body composition.

We were also unable to include objective measures of physical activity within our model. Despite preliminary analyses revealing a significant association between the time infant's spent sedentary and their size at age 12 months, a lack of data prevented its consideration. We did however include a proxy variable; time spent playing physically active games, reported by the mother in a questionnaire.
